# Supplementary material
Source: PubMed Central journal article supplement (PMC3289334)
Supplement: 1111637109_sapp.pdf [file 1111637109_sapp.pdf]

## **SUPPORTING INFORMATION APPENDIX**

### **Supporting Materials and Methods**

#### **Sequencing Protocol**

The entire horse mtDNA was amplified in 11 overlapping PCR fragments, using a set of oligonucleotides with matching annealing temperatures (Table S10). Oligonucleotides were checked (through GenBank BLAST) in order to avoid amplification of nuclear insertions of mitochondrial sequences (numts) (1). After PCR, the fragments were purified using the ExoSAP-IT® enzymatic system (Exonuclease I and Shrimp Alkaline Phosphatase, GE Healthcare) and standard dideoxysequencing was performed by using a set of 33 nested primers (Table S11) specifically designed for this protocol. An ABI 3730 sequencer with 96 capillaries was employed for separation of the sequencing ladders. Complete sequences were aligned, assembled, and compared using the program Sequencher 4.9 (Gene Codes). Traces were generally of excellent quality and there was extensive overlap between reads with most observed mutations determined by at least two independent sequencing reactions. At least two independent operators read each sequence and any potentially ambiguous base call was tested by additional and independent PCR and sequencing reactions.





**Figure S1.** A putative most parsimonious tree of complete mtDNA sequences from horses. This tree encompasses 83 sequences and was rooted by using a published donkey (*E. asinus*) sequence. Mutations are shown on the branches and are numbered according to a new proposed horse reference sequence (HRS, see Table S1). This mtDNA differs from the GenBank RefSeq NC001640 (reported in italics in the tree for the sake of clarity, but disregarded in all calculations) at the following sites: 357+C, 2227delT, 5098A(tRNA-Ala), 5240delA, 5279delA, 10125G(R71G ND4L), 10126C(R71P ND4L), 10828C, 10829C(V209L ND4), 13687(I34N ND6), 13711(G42H ND6), 13744T(G53I ND6), 13998G(E138D ND6), 15388delT. Taking into account the widespread use of the RefSeq NC001640, the original nucleotide numbering was retained. In view of this, we have removed one of the two Cs at nps 357-358 and artificially introduced an N at nps 2227, 5240, 5279 and 15388 (GenBank accession n. JN398377). Mutations are transitions unless a base is explicitly indicated. Suffixes indicate transversions (to A, G, C, or T), indels (+, d), heteroplasmy (h) or reversions (@). Recurrent mutations are underlined. A basal motif for haplogroup H was extrapolated by a comparison with the GenBank sequence EU939445. However, this and another three GenBank records (AY584828, EF597512 and NC001640) were excluded from phylogenetic analyses due to a suspicious and apparently unjustified surplus of mutations in the reported sequences. Further information on the 81 novel sequences is reported in Table S1. The branching of a recently published Przewalski's horse sequence (AP012269) (2), predating the node of haplogroup J'K in the phylogeny, is indicated by a dotted line. The tree shown is only one out of many nearly most parsimonious trees, which mainly differ in the different reconstruction of mutations at highly recurrent sites.

The inset in Figure S1A shows the tree based on a Bayesian approach performed with Bayes 3.1.2 (3) in order to double-check the topology of the horse phylogeny. We set the HKY85 evolutionary model with the gamma-distributed rate variation. The analysis was run using four incrementally heated chains with the default temperature; over 500,000 generations long until the average standard deviation of split frequencies reached the threshold value of 0.01. When calculating summary statistics, we skipped 25% of the initial trees to obtain a potential scale reduction factor (PSRF) value reasonably close to 1.0 for all calculated parameters. The resulting tree topology was very similar to the results obtained with the MP approach.

**Figure S2**

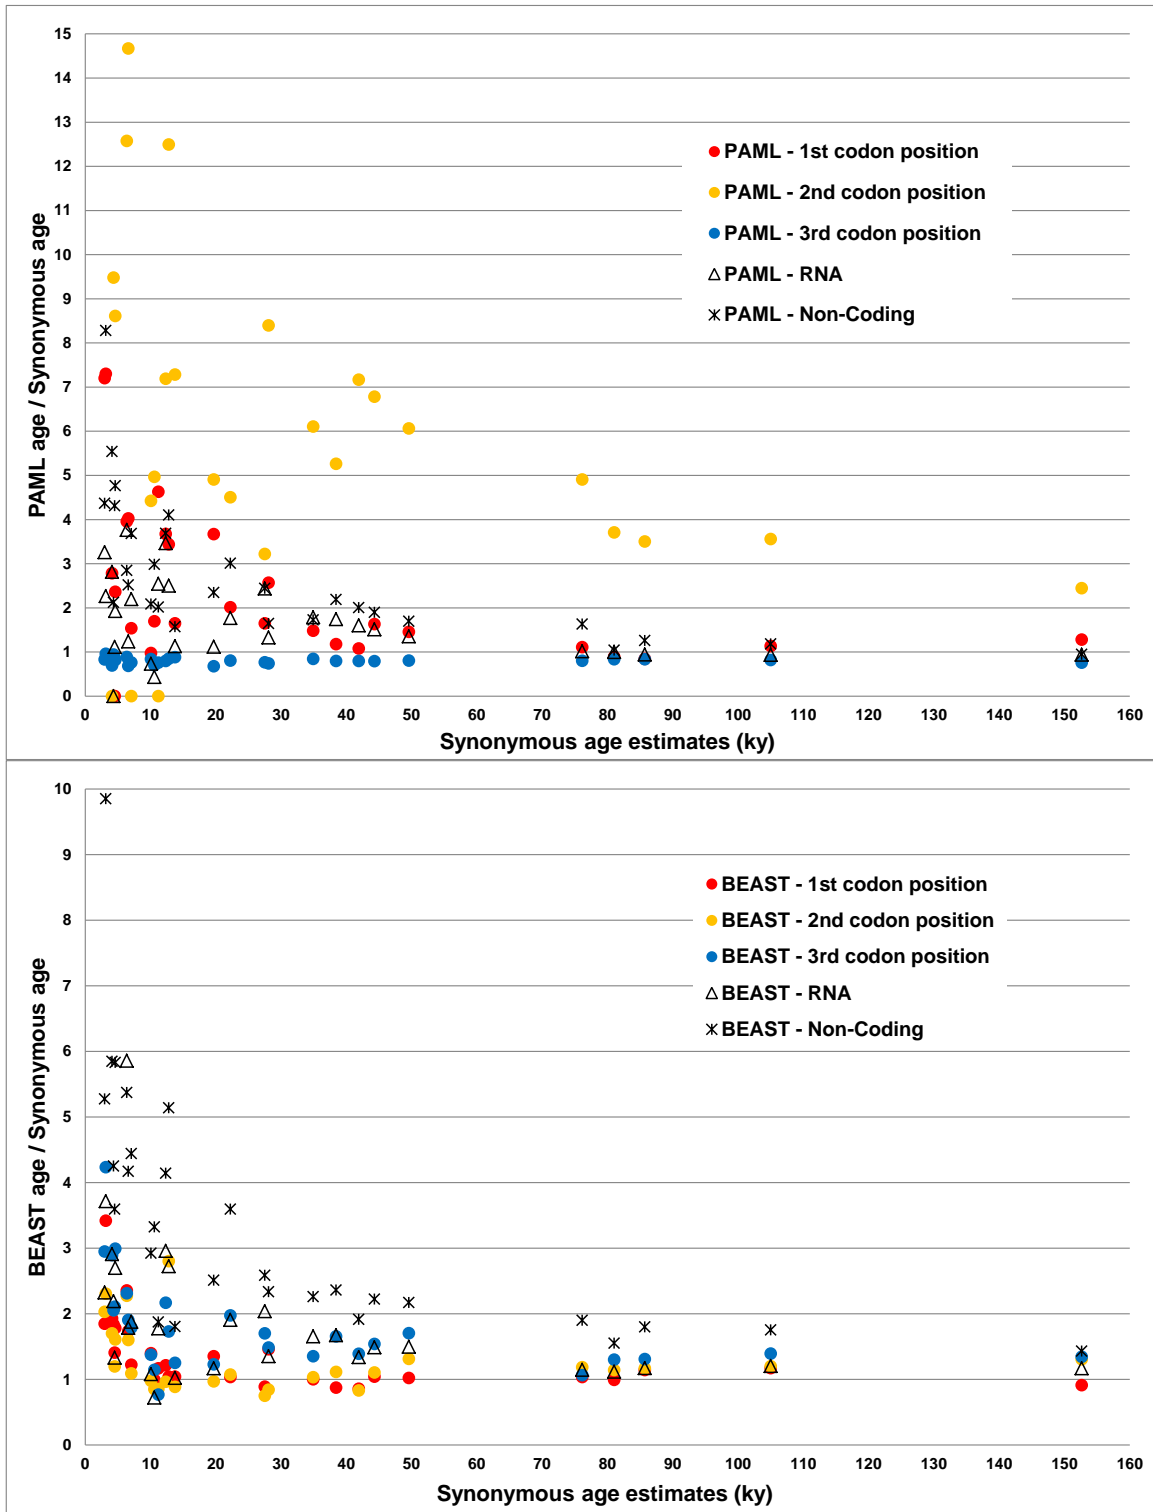

**Figure S2.** Comparison of age estimates obtained with the five partitions. Ages calculated both with PAML (top) and BEAST (bottom) using the same five datasets (1<sup>st</sup>, 2<sup>nd</sup> and 3<sup>rd</sup> codons, RNA genes, and non-coding region) were weighted on the synonymous estimates. With both methods, the ratio values are inversely correlated with age. See Table S3 for further details.

**Figure S3**

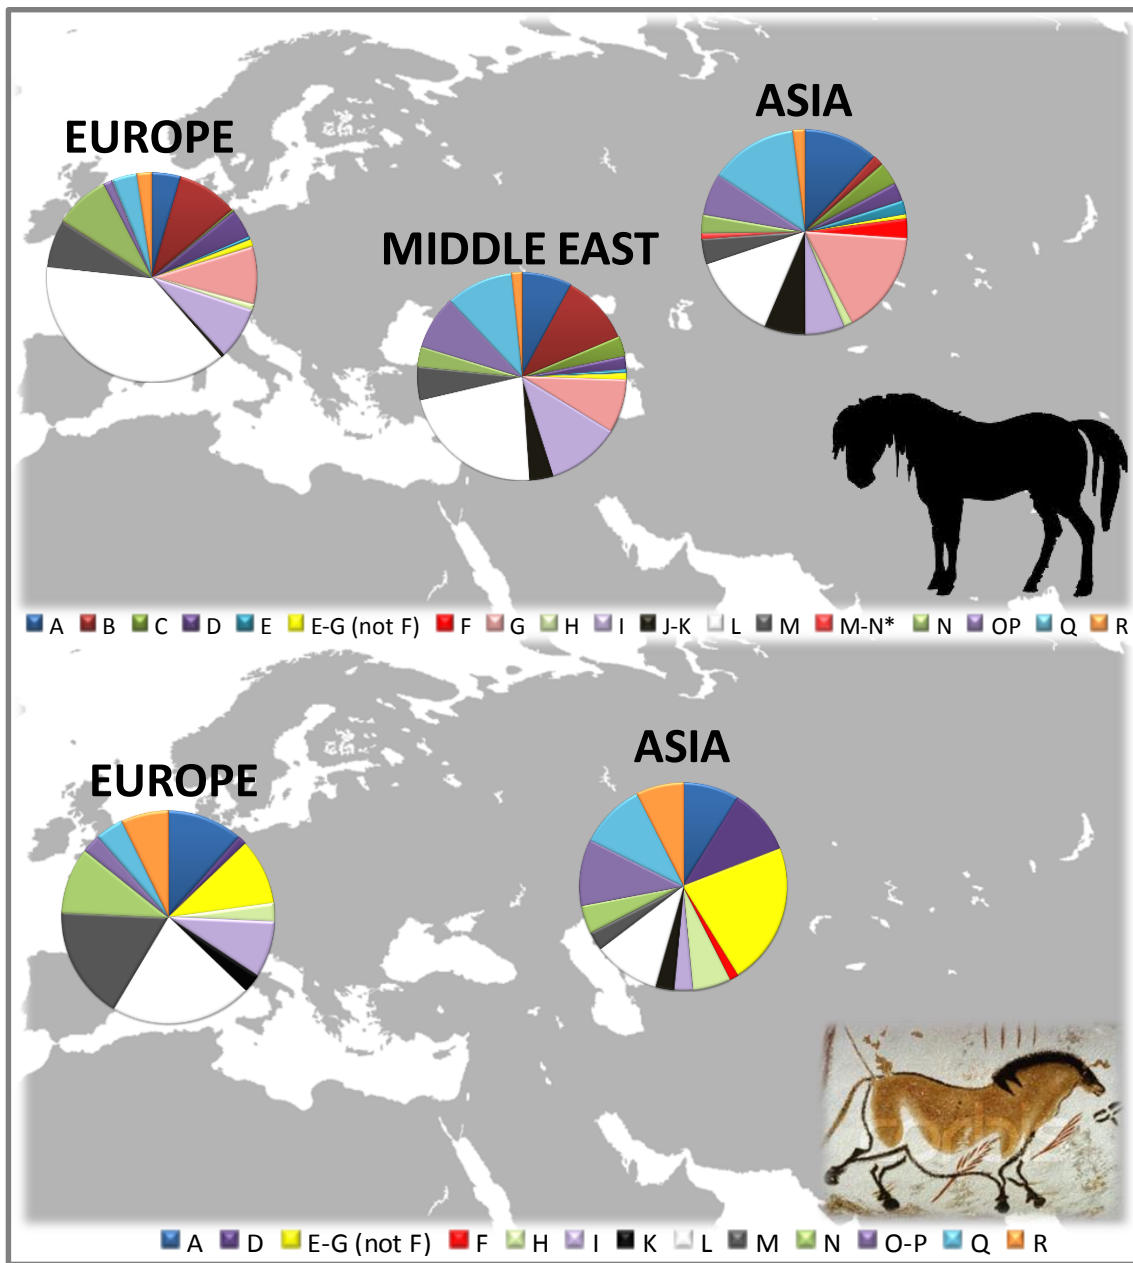

**Figure S3.** Spatial frequency distributions of horse haplogroups in Eurasia in modern (above) and ancient (below) DNA samples. A total of 2028 modern and 138 ancient control-region sequences are included. Population samples and corresponding frequency values are listed in Tables S6-S8.

**Table S1.** Sources and haplogroup affiliation for the horse complete mtDNA sequences.

| # <sup>a</sup> | ID                       | Haplogroup | Breed                     | Geographic Origin | GenBank # |
|----------------|--------------------------|------------|---------------------------|-------------------|-----------|
| 01             | HRS <sup>b</sup> (ChP01) | A          | Chincoteague Pony         | America North     | JN398377  |
| 02             | CsP01                    | A          | Caspian Pony              | Middle East       | JN398378  |
| 03             | Mrm12                    | A          | Maremmano                 | Europe South      | JN398379  |
| 04             | Arb05                    | A          | Arabian                   | Middle East       | JN398380  |
| 05             | Mrm11                    | A          | Maremmano                 | Europe South      | JN398381  |
| 06             | Mrm07                    | A          | Maremmano                 | Europe South      | JN398382  |
| 07             | Irn14                    | A          | Unspecified Iranian Breed | Middle East       | JN398383  |
| 08             | Syr02                    | A          | Unspecified Syrian Breed  | Middle East       | JN398384  |
| 09             | AkT10                    | A          | Akhal-Teke                | Asia Centre       | JN398385  |
| 10             | WeP01                    | B          | Westphalian               | Europe Centre     | JN398386  |
| 11             | Mrm14                    | B          | Maremmano                 | Europe South      | JN398387  |
| 12             | Mrm08                    | B          | Maremmano                 | Europe South      | JN398388  |
| 13             | Syr05                    | B          | Unspecified Syrian Breed  | Middle East       | JN398389  |
| 14             | Ita01                    | B          | Unspecified Italian Breed | Europe South      | JN398390  |
| 15             | Syr04                    | B          | Unspecified Syrian Breed  | Middle East       | JN398391  |
| 16             | Arb02                    | C          | Arabian                   | Middle East       | JN398392  |
| 17             | AkT11                    | C          | Akhal-Teke                | Asia Centre       | JN398393  |
| 18             | Syr01                    | C          | Unspecified Syrian Breed  | Middle East       | JN398394  |
| 19             | Irn09                    | C          | Unspecified Iranian Breed | Middle East       | JN398395  |
| 20             | SfP01                    | C          | Suffolk Punch             | Europe North      | JN398396  |
| 21             | Mrm13                    | C          | Maremmano                 | Europe South      | JN398397  |
| 22             | NoF01                    | D          | Norwegian Fjord           | Europe North      | JN398398  |
| 23             | ILH02                    | D          | Icelandic Horse           | Europe North      | JN398399  |
| 24             | ILH01                    | D          | Icelandic Horse           | Europe North      | JN398400  |
| 25             | Mrm05                    | E          | Maremmano                 | Europe South      | JN398401  |
| 26             | Prz01                    | F          | Przewalskii               | Asia Centre       | JN398402  |
| 27             | Prz02                    | F          | Przewalskii               | Asia Centre       | JN398403  |
| 28             | AkT06                    | G          | Akhal-Teke                | Asia Centre       | JN398404  |
| 29             | Naqu01                   | G          | Naqu                      | Asia Centre       | EF597513  |
| 30             | Irn05                    | G          | Unspecified Iranian Breed | Middle East       | JN398405  |
| 31             | Arb03                    | G          | Arabian                   | Middle East       | JN398406  |
| 32             | Gia02                    | G          | Giara Horse (Sardinia)    | Europe South      | JN398407  |
| 33             | Syr03                    | G          | Unspecified Syrian Breed  | Middle East       | JN398408  |
| 34             | Ita02                    | G          | Unspecified Italian Breed | Europe South      | JN398409  |
| 35             | AkT07                    | G          | Akhal-Teke                | Asia Centre       | JN398410  |
| 36             | Gia01                    | G          | Giara Horse (Sardinia)    | Europe South      | JN398411  |
| 37             | Arb06                    | G          | Arabian                   | Middle East       | JN398412  |
| 38             | Mrm06                    | H          | Maremmano                 | Europe South      | JN398413  |
| 39             | Irn11                    | I          | Unspecified Iranian Breed | Middle East       | JN398414  |
| 40             | Irn10                    | I          | Unspecified Iranian Breed | Middle East       | JN398415  |
| 41             | CsP04                    | I          | Caspian Pony              | Middle East       | JN398416  |
| 42             | Trk01                    | I          | Trakhener                 | Europe North      | JN398417  |
| 43             | Mrm15                    | J          | Maremmano                 | Europe South      | JN398418  |
| 44             | Irn02                    | J          | Unspecified Iranian Breed | Middle East       | JN398419  |
| 45             | Bel01                    | K          | Belgian Draft             | Europe Centre     | JN398420  |
| 46             | AkT09                    | L          | Akhal-Teke                | Asia Centre       | JN398422  |
| 47             | Irn01                    | L          | Unspecified Iranian Breed | Middle East       | JN398423  |
| 48             | APH01                    | L          | American Paint Horse      | America North     | JN398421  |

|    |        |     |                           |               |           |
|----|--------|-----|---------------------------|---------------|-----------|
| 49 | AkT08  | L   | Akhal-Teke                | Asia Centre   | JN398424  |
| 50 | Ita03  | L   | Unspecified Italian Breed | Europe South  | JN398425  |
| 51 | Mrm03  | L   | Maremmano                 | Europe South  | JN398427  |
| 52 | Mrm10  | L   | Maremmano                 | Europe South  | JN398426  |
| 53 | CsP02  | L   | Caspian Pony              | Middle East   | JN398428  |
| 54 | Old01  | L   | Oldenburg                 | Europe North  | JN398429  |
| 55 | And01  | L   | Andalusian                | Europe South  | JN398430  |
| 56 | Sil01  | L   | Silesian                  | Europe Centre | JN398431  |
| 57 | Mrm04  | L   | Maremmano                 | Europe South  | JN398432  |
| 58 | Irn13  | L   | Unspecified Iranian Breed | Middle East   | JN398433  |
| 59 | Arb04  | L   | Arabian                   | Middle East   | JN398434  |
| 60 | AkT05  | M   | Akhal-Teke                | Asia Centre   | JN398435  |
| 61 | CsP05  | M   | Caspian Pony              | Middle East   | JN398436  |
| 62 | Cly01  | M   | Clydesdale                | Europe North  | JN398439  |
| 63 | Mrm01  | M   | Maremmano                 | Europe South  | JN398437  |
| 64 | Fre01  | M   | Friesian                  | Europe Centre | JN398438  |
| 65 | EnS01  | N   | English Shire             | Europe North  | JN398440  |
| 66 | Sad01  | N   | Saddlebred                | America North | JN398441  |
| 67 | Exm01  | N   | Exmoor Pony               | Europe North  | JN398442  |
| 68 | And02  | N   | Andalusian                | Europe South  | JN398443  |
| 69 | Irn06  | N   | Unspecified Iranian Breed | Middle East   | JN398444  |
| 70 | Irn12  | O   | Unspecified Iranian Breed | Middle East   | JN398445  |
| 71 | Irn03  | P   | Unspecified Iranian Breed | Middle East   | JN398446  |
| 72 | CsP03  | P   | Caspian Pony              | Middle East   | JN398447  |
| 73 | Arb01  | P   | Arabian                   | Middle East   | JN398448  |
| 74 | AkT02  | Q   | Akhal-Teke                | Asia Centre   | JN398449  |
| 75 | AkT01  | Q   | Akhal-Teke                | Asia Centre   | JN398450  |
| 76 | Irn07  | Q   | Unspecified Iranian Breed | Middle East   | JN398451  |
| 77 | AkT04  | Q   | Akhal-Teke                | Asia Centre   | JN398452  |
| 78 | AkT03  | Q   | Akhal-Teke                | Asia Centre   | JN398453  |
| 79 | Deqin1 | Q   | Deqin                     | Asia Centre   | EF597514  |
| 80 | Mrm02  | Q   | Maremmano                 | Europe South  | JN398454  |
| 81 | Irn08  | Q   | Unspecified Iranian Breed | Middle East   | JN398455  |
| 82 | Mrm09  | R   | Maremmano                 | Europe South  | JN398456  |
| 83 | Irn04  | R   | Unspecified Iranian Breed | Middle East   | JN398457  |
|    | DRS    | DRS | <i>Equus asinus</i>       | Europe North? | NC_001788 |

<sup>a</sup>Numbered as in the tree of Fig. 2.

<sup>b</sup>This is the newly proposed horse reference sequence (HRS).



**Table S2.** Age estimates<sup>a</sup> calculated on the protein coding genes (by considering only synonymous mutations) and on the entire genome partitioned into five datasets (1st, 2nd and 3rd positions of the codons, RNAs and non-coding region).

| Node             | ML (synonymous mutations) |                  | ML (all substitutions) |                 | Bayesian (all substitutions) |                 |
|------------------|---------------------------|------------------|------------------------|-----------------|------------------------------|-----------------|
|                  | Age                       | 95% CI           | Age                    | 95% CI          | Median                       | 95% HPD         |
| <b>A-R (AMM)</b> | 152.64                    | {122.64; 182.64} | 133.46                 | {96.52; 170.40} | 157.23                       | {109.46-214.05} |
| <b>A-Q</b>       | 105.01                    | {84.94; 125.09}  | 98.41                  | {72.28; 124.53} | 120.67                       | {89.74-165.22}  |
| <b>A-L</b>       | 85.71                     | {68.28; 103.13}  | 79.85                  | {58.68; 101.03} | 97.61                        | {69.20-130.82}  |
| <b>A-K</b>       | 81.02                     | {64.56; 97.48}   | 76.21                  | {55.96; 96.47}  | 91.04                        | {66.88-124.00}  |
| <b>A-I</b>       | 49.56                     | {37.73; 61.40}   | 55.55                  | {40.47; 70.62}  | 66.73                        | {47.65-89.88}   |
| <b>A-D</b>       | 38.44                     | {25.66; 51.21}   | 44.51                  | {31.39; 57.63}  | 51.58                        | {35.00-70.67}   |
| <b>A-C</b>       | 27.51                     | {16.39; 38.62}   | 33.41                  | {22.71; 44.11}  | 37.92                        | {25.41-53.07}   |
| <b>A-B</b>       | 12.33                     | {1.23; 23.42}    | 20.55                  | {12.84; 28.26}  | 23.03                        | {14.66-33.40}   |
| <b>A</b>         | 3.15                      | {0.00; 6.34}     | 8.98                   | {5.30; 12.67}   | 10.69                        | {6.54-16.02}    |
| <b>B</b>         | 7.07                      | {0.00; 16.19}    | 9.63                   | {5.03; 14.23}   | 11.37                        | {6.82-17.27}    |
| <b>C</b>         | 4.59                      | {0.00; 9.80}     | 7.63                   | {3.49; 11.78}   | 9.71                         | {5.73-14.73}    |
| <b>D</b>         | 0.00                      | -                | 3.93                   | {0.60; 7.27}    | 6.44                         | {3.07-10.82}    |
| <b>E-I</b>       | 44.30                     | {33.34; 55.26}   | 52.20                  | {37.93; 66.47}  | 61.28                        | {43.86-82.78}   |
| <b>E-G</b>       | 28.09                     | {17.16; 39.03}   | 33.17                  | {22.24; 44.11}  | 40.38                        | {27.27-56.91}   |
| <b>F-G</b>       | 19.68                     | {8.84; 30.53}    | 23.55                  | {14.91; 32.18}  | 27.25                        | {16.94-39.07}   |
| <b>G</b>         | 6.59                      | {0.00; 14.92}    | 9.16                   | {5.36; 12.96}   | 11.6                         | {7.26-17.07}    |
| <b>H-I</b>       | 41.91                     | {30.93; 52.89}   | 48.97                  | {34.93; 63.01}  | 54.52                        | {37.37-74.36}   |
| <b>I</b>         | 10.59                     | {3.96; 17.21}    | 12.21                  | {6.34; 18.08}   | 13.63                        | {7.59-21.78}    |
| <b>J-K</b>       | 34.92                     | {22.70; 47.14}   | 41.22                  | {27.87; 54.57}  | 47.9                         | {31.44-67.79}   |
| <b>J</b>         | 11.19                     | {3.76; 18.63}    | 15.50                  | {8.14; 22.87}   | 16.18                        | {7.51-25.81}    |
| <b>L</b>         | 6.37                      | {0.00; 13.96}    | 9.57                   | {5.66; 13.48}   | 13.19                        | {8.32-19.6}     |
| <b>M-Q</b>       | 76.13                     | {56.98; 95.28}   | 74.22                  | {53.04; 95.39}  | 87.99                        | {61.39-120.52}  |
| <b>M-N</b>       | 12.79                     | {0.00; 30.28}    | 21.61                  | {12.86; 30.35}  | 27.44                        | {17.22-41.07}   |
| <b>M</b>         | 4.11                      | {0.00; 12.08}    | 6.63                   | {2.38; 10.89}   | 8.87                         | {5-13.96}       |
| <b>N</b>         | 4.33                      | {0.00; 23.42}    | 4.93                   | {1.48; 8.38}    | 7.86                         | {4.13-12.67}    |
| <b>O-Q</b>       | 22.23                     | {12.39; 32.06}   | 29.18                  | {18.71; 39.65}  | 34.38                        | {21.53-49.83}   |
| <b>O-P</b>       | 13.75                     | {6.14; 21.36}    | 15.97                  | {8.95; 22.99}   | 17.41                        | {9.6-27.53}     |
| <b>P</b>         | 4.53                      | {0.00; 12.32}    | 6.63                   | {2.61; 10.66}   | 7.54                         | {4.06-12.24}    |
| <b>Q</b>         | 10.07                     | {3.90; 16.25}    | 9.86                   | {5.49; 14.24}   | 11.93                        | {7.28-17.95}    |
| <b>R</b>         | 2.98                      | {0.00; 7.13}     | 6.99                   | {2.15; 11.82}   | 7.66                         | {3.52-13.32}    |

<sup>a</sup> Age estimates are indicated in ky.

**Table S3.** PAML and Beast age estimates <sup>a</sup> of relevant nodes in the horse phylogeny for each of the five partitions (1st, 2nd and 3rd positions of the codons, RNAs and non-coding regions).

| <b>NODE</b>      | <b>1st CODON POSITION</b> |                 | <b>2nd CODON POSITION</b> |                  | <b>3rd CODON POSITION</b> |                 | <b>RNA</b>          |                 | <b>NON-CODING</b>   |                 |
|------------------|---------------------------|-----------------|---------------------------|------------------|---------------------------|-----------------|---------------------|-----------------|---------------------|-----------------|
| <b>PAML</b>      |                           |                 |                           |                  |                           |                 |                     |                 |                     |                 |
|                  | <b>Age estimate</b>       | <b>95% CI</b>   | <b>Age estimate</b>       | <b>95% CI</b>    | <b>Age estimate</b>       | <b>95% CI</b>   | <b>Age estimate</b> | <b>95% CI</b>   | <b>Age estimate</b> | <b>95% CI</b>   |
| <b>A-R (AMM)</b> | 195.89                    | {107.9; 283.87} | 373.56                    | {211.62; 535.5}  | 115.81                    | {94.7; 136.92}  | 143.5               | {80.8; 206.21}  | 144.72              | {84.74; 204.71} |
| <b>A-Q</b>       | 119.11                    | {62.29; 175.92} | 373.56                    | {211.62; 535.5}  | 86.14                     | {71.53; 100.75} | 98.31               | {60.87; 135.75} | 124.39              | {82.91; 165.87} |
| <b>A-L</b>       | 72.25                     | {45.6; 98.9}    | 300.45                    | {177.77; 423.13} | 71.54                     | {59.05; 84.03}  | 80.91               | {52.76; 109.07} | 107.95              | {71.41; 144.48} |
| <b>A-K</b>       | 72.25                     | {45.77; 98.73}  | 300.45                    | {178.75; 422.15} | 67.7                      | {55.65; 79.76}  | 80.91               | {52.91; 108.92} | 84.47               | {50.89; 118.04} |
| <b>A-I</b>       | 72.25                     | {45.94; 98.56}  | 300.45                    | {178.75; 422.15} | 39.88                     | {31.21; 48.54}  | 67.09               | {43.8; 90.38}   | 84.07               | {55.07; 113.07} |
| <b>A-D</b>       | 45.32                     | {21.35; 69.28}  | 202.3                     | {61.95; 342.65}  | 30.61                     | {21.76; 39.46}  | 67.09               | {43.65; 90.53}  | 84.07               | {55.07; 113.07} |
| <b>A-C</b>       | 45.32                     | {21.35; 69.28}  | 88.63                     | {23.86; 153.41}  | 21.14                     | {13.44; 28.83}  | 67.09               | {43.65; 90.53}  | 67.12               | {36.17; 98.07}  |
| <b>A-B</b>       | 45.32                     | {21.35; 69.28}  | 88.63                     | {23.86; 153.41}  | 9.82                      | {4.5; 15.15}    | 42.71               | {11.66; 73.76}  | 45.45               | {21.59; 69.32}  |
| <b>A</b>         | 23                        | {5.57; 40.43}   | 88.63                     | {24.84; 152.43}  | 3.02                      | {0.93; 5.1}     | 7.14                | {0; 15.36}      | 26.09               | {9.94; 42.23}   |
| <b>B</b>         | 10.86                     | {0; 23.26}      | 0                         | {0; 12.76}       | 5.41                      | {2.12; 8.71}    | 15.53               | {0; 32.73}      | 26.04               | {6.13; 45.96}   |
| <b>C</b>         | 10.86                     | {0; 23.26}      | 39.56                     | {0; 92.56}       | 3.76                      | {0.58; 6.95}    | 8.85                | {0; 21.03}      | 21.9                | {4.1; 39.69}    |
| <b>D</b>         | 16.5                      | {0; 37.28}      | 0                         | {0; 12.76}       | 0                         | {0; 0.25}       | 0                   | {0; 1.83}       | 11.77               | {0.1; 23.44}    |
| <b>E-I</b>       | 72.25                     | {45.94; 98.56}  | 300.45                    | {178.75; 422.15} | 35.19                     | {27.07; 43.3}   | 67.09               | {43.8; 90.38}   | 84.07               | {55.09; 113.06} |
| <b>E-G</b>       | 72.25                     | {45.77; 98.73}  | 235.85                    | {103.36; 368.35} | 20.81                     | {12.91; 28.71}  | 37.27               | {11.09; 63.45}  | 46.23               | {20.65; 71.81}  |
| <b>F-G</b>       | 72.25                     | {45.77; 98.73}  | 96.64                     | {13.22; 180.07}  | 13.35                     | {6.85; 19.85}   | 22.05               | {0.75; 43.36}   | 46.23               | {20.65; 71.81}  |
| <b>G</b>         | 26.51                     | {6.9; 46.11}    | 96.64                     | {14.2; 179.09}   | 4.51                      | {1.61; 7.41}    | 8.15                | {0; 16.37}      | 16.58               | {2.15; 31.02}   |
| <b>H-I</b>       | 45.32                     | {10.12; 80.51}  | 300.45                    | {178.75; 422.15} | 33.34                     | {24.96; 41.72}  | 67.09               | {43.65; 90.53}  | 83.96               | {40.02; 127.9}  |
| <b>I</b>         | 17.96                     | {0; 37.73}      | 52.58                     | {0; 154.65}      | 7.42                      | {2.49; 12.34}   | 4.58                | {0; 14.02}      | 31.6                | {9.63; 53.57}   |
| <b>J-K</b>       | 51.81                     | {20.98; 82.65}  | 213.32                    | {60.21; 366.43}  | 29.47                     | {19.45; 39.5}   | 62.43               | {29.25; 95.61}  | 60.31               | {29.74; 90.89}  |
| <b>J</b>         | 51.81                     | {20.98; 82.65}  | 0                         | {0; 11.78}       | 8.5                       | {2.49; 14.51}   | 28.5                | {3.08; 53.92}   | 22.57               | {2.51; 42.62}   |
| <b>L</b>         | 25.22                     | {1.93; 48.52}   | 80.12                     | {0; 174.34}      | 5.66                      | {2.98; 8.33}    | 23.99               | {0.1; 47.89}    | 18.14               | {7.09; 29.19}   |
| <b>M-Q</b>       | 84.48                     | {38.73; 130.23} | 373.56                    | {211.62; 535.5}  | 61.18                     | {47.25; 75.11}  | 77.19               | {38.68; 115.69} | 124.39              | {82.91; 165.87} |

|            |       |                |        |             |       |                |       |               |       |                 |
|------------|-------|----------------|--------|-------------|-------|----------------|-------|---------------|-------|-----------------|
| <b>M-N</b> | 43.95 | {0; 88.53}     | 159.74 | {0; 322.66} | 10.83 | {4.56; 17.1}   | 31.99 | {2.62; 61.37} | 52.48 | {21.49; 83.46}  |
| <b>M</b>   | 11.46 | {0; 27.71}     | 0      | {0; 12.76}  | 2.85  | {0; 6}         | 11.57 | {0; 24.96}    | 22.79 | {1.55; 44.04}   |
| <b>N</b>   | 0     | {0; 2.35}      | 41.06  | {0; 121.54} | 4.09  | {0.26; 7.92}   | 0     | {0; 2.13}     | 9.2   | {0.01; 18.39}   |
| <b>O-Q</b> | 44.72 | {12.21; 77.23} | 100.15 | {0; 215.96} | 17.94 | {10.34; 25.54} | 39.37 | {8.32; 70.42} | 66.9  | {31.01; 102.78} |
| <b>O-P</b> | 22.66 | {0; 46.62}     | 100.15 | {0; 214.98} | 12.17 | {5.92; 18.43}  | 15.53 | {0; 37.14}    | 21.59 | {2.08; 41.1}    |
| <b>P</b>   | 0     | {0; 2.18}      | 100.15 | {0; 214.98} | 3.9   | {0.2; 7.59}    | 5.05  | {0; 15.09}    | 19.52 | {0; 41.85}      |
| <b>Q</b>   | 9.83  | {0; 23.41}     | 44.57  | {0; 133.88} | 8.46  | {3.89; 13.03}  | 7.38  | {0; 17.57}    | 21    | {8.36; 33.65}   |
| <b>R</b>   | 21.46 | {0; 51.29}     | 70.61  | {0; 203.1}  | 2.48  | {0; 5.93}      | 9.71  | {0; 28.73}    | 13.01 | {0; 28.24}      |

### BEAST

|                  | <b>Median</b> | <b>95% HPD</b>  |
|------------------|---------------|----------------|---------------|----------------|---------------|----------------|---------------|----------------|---------------|-----------------|
| <b>A-R (AMM)</b> | 139.28        | {61.56-298.18} | 199.75        | {97.53-346.84} | 205.33        | {77.94-446.53} | 178.72        | {91.26-322.24} | 218.63        | {113.22-368.37} |
| <b>A-Q</b>       | 123.16        | {57.25-251.25} | 126.14        | {63.57-219.49} | 146.31        | {64.87-306.55} | 126.44        | {67.08-212.69} | 184.34        | {94.32-300.15}  |
| <b>A-L</b>       | 97.94         | {42.47-195.41} | 100.27        | {50.18-177.97} | 112.48        | {49.86-230.33} | 100.46        | {54.10-168.95} | 154.26        | {75.35-249.39}  |
| <b>A-K</b>       | 80.57         | {38.65-161.35} | 92.73         | {48.41-165.41} | 105.64        | {49.11-217.88} | 90.49         | {45.44-149.18} | 125.88        | {63.59-206.85}  |
| <b>A-I</b>       | 50.76         | {21.93-99.52}  | 65.12         | {31.94-116.54} | 84.58         | {37.16-170.00} | 74.28         | {39.16-122.98} | 107.65        | {55.78-177.77}  |
| <b>A-D</b>       | 33.68         | {12.78-69.01}  | 42.91         | {18.56-77.08}  | 63.64         | {27.13-129.13} | 64.4          | {32.34-109.43} | 90.84         | {42.42-151.53}  |
| <b>A-C</b>       | 24.52         | {8.53-49.65}   | 20.65         | {8.51-41.73}   | 46.82         | {18.55-96.70}  | 56.13         | {24.40-96.00}  | 71.15         | {32.54-121.55}  |
| <b>A-B</b>       | 14.99         | {5.39-31.79}   | 11.89         | {4.56-24.04}   | 26.74         | {8.91-57.31}   | 36.5          | {13.55-68.64}  | 51.08         | {22.93-90.07}   |
| <b>A</b>         | 10.78         | {4.05-23.12}   | 7.27          | {3.09-14.38}   | 13.35         | {4.67-29.18}   | 11.71         | {3.39-27.48}   | 31.04         | {13.38-58.16}   |
| <b>B</b>         | 8.65          | {2.92-18.81}   | 7.71          | {2.98-15.68}   | 12.65         | {4.49-28.04}   | 13.29         | {3.09-34.46}   | 31.41         | {12.50-61.38}   |
| <b>C</b>         | 8.19          | {2.83-18.88}   | 7.4           | {2.69-16.02}   | 13.76         | {4.60-31.60}   | 12.4          | {3.43-31.83}   | 26.79         | {9.98-55.74}    |
| <b>D</b>         | 5.53          | {0.07-14.91}   | 7.39          | {2.23-18.59}   | 7.03          | {0.04-17.40}   | 6.63          | {0.41-19.88}   | 16.44         | {5.76-34.93}    |
| <b>E-I</b>       | 46.26         | {19.68-89.72}  | 49.06         | {21.11-88.26}  | 68.29         | {27.82-136.94} | 66            | {33.52-110.81} | 98.55         | {50.93-165.43}  |
| <b>E-G</b>       | 41.01         | {15.69-78.73}  | 23.73         | {8.47-46.04}   | 41.75         | {12.19-85.29}  | 38.07         | {13.39-71.44}  | 65.65         | {29.10-115.29}  |
| <b>F-G</b>       | 26.67         | {9.58-52.29}   | 19.09         | {6.90-37.46}   | 24.23         | {7.60-52.19}   | 23            | {6.84-46.45}   | 49.48         | {21.03-90.61}   |
| <b>G</b>         | 11.45         | {3.94-24.68}   | 10.56         | {3.86-22.05}   | 12.56         | {4.22-26.17}   | 11.76         | {3.84-26.05}   | 27.49         | {11.44-52.27}   |
| <b>H-I</b>       | 36            | {13.66-69.87}  | 34.87         | {13.48-65.54}  | 58.3          | {21.41-116.6}  | 56.16         | {24.99-96.98}  | 80.28         | {37.01-138.32}  |
| <b>I</b>         | 10.51         | {2.68-25.19}   | 9.04          | {2.82-21.15}   | 12.13         | {3.49-29.49}   | 7.65          | {2.02-20.00}   | 35.21         | {12.92-69.03}   |

|            |       |                |       |                |       |                |       |                |        |                |
|------------|-------|----------------|-------|----------------|-------|----------------|-------|----------------|--------|----------------|
| <b>J-K</b> | 35.02 | {8.90-73.65}   | 36.13 | {12.11-71.90}  | 47.3  | {14.04-101.45} | 57.82 | {18.17-106.31} | 78.96  | {30.38-138.97} |
| <b>J</b>   | 13.09 | {2.04-36.17}   | 9.57  | {2.45-25.59}   | 8.62  | {0.88-21.91}   | 19.91 | {3.47-50.49}   | 20.99  | {6.02-48.06}   |
| <b>L</b>   | 15.02 | {4.12-35.77}   | 14.5  | {4.58-32.09}   | 14.74 | {4.47-35.38}   | 37.32 | {9.59-76.59}   | 34.24  | {14.06-65.44}  |
| <b>M-Q</b> | 79.05 | {32.90-158.51} | 90.28 | {45.53-160.75} | 81.14 | {27.96-175.01} | 87.2  | {39.38-155.16} | 144.71 | {69.67-243.12} |
| <b>M-N</b> | 13.35 | {4.06-32.08}   | 35.84 | {13.64-72.25}  | 22.14 | {6.76-54.76}   | 34.84 | {10.02-74.72}  | 65.72  | {25.96-121.66} |
| <b>M</b>   | 7.94  | {2.52-18.32}   | 7     | {2.56-15.99}   | 11.91 | {3.73-27.82}   | 11.97 | {2.80-31.08}   | 24.06  | {7.25-52.38}   |
| <b>N</b>   | 7.96  | {2.19-19.14}   | 8.92  | {2.79-21.41}   | 8.9   | {1.78-20.32}   | 9.5   | {1.82-28.98}   | 18.42  | {6.66-37.15}   |
| <b>O-Q</b> | 23.04 | {7.31-51.88}   | 23.88 | {9.07-49.85}   | 43.96 | {12.11-99.46}  | 42.37 | {12.78-82.70}  | 79.91  | {34.75-147.79} |
| <b>O-P</b> | 14.33 | {3.95-33.33}   | 12.2  | {3.17-27.17}   | 17.25 | {4.28-43.43}   | 14.06 | {2.91-38.16}   | 24.85  | {7.80-53.68}   |
| <b>P</b>   | 6.38  | {1.23-15.36}   | 5.43  | {0.57-12.04}   | 9.55  | {2.58-21.41}   | 6.03  | {1.17-14.63}   | 16.28  | {5.60-34.18}   |
| <b>Q</b>   | 14.1  | {4.42-32.47}   | 9.88  | {3.34-21.20}   | 13.87 | {4.11-33.83}   | 10.88 | {3.22-26.78}   | 29.46  | {11.55-56.55}  |
| <b>R</b>   | 5.51  | {0.19-16.57}   | 6.05  | {1.31-16.13}   | 8.79  | {1.27-23.56}   | 6.93  | {0.16-27.55}   | 15.72  | {3.74-37.97}   |

<sup>a</sup> Age estimates are indicated in ky.

**Table S4.** Diagnostic mutational motifs of the newly defined horse mtDNA haplogroups. A comparison between the new and the old nomenclatures based on partial sequences is shown.

| Revised Nomenclature of Nodes and Haplogroups | Diagnostic Mutational Motif <sup>a</sup>                                                                                                                                                                                     | Nomenclature by Cai and Jansen <sup>b</sup> | Nomenclature by Cieslak <sup>c</sup> |
|-----------------------------------------------|------------------------------------------------------------------------------------------------------------------------------------------------------------------------------------------------------------------------------|---------------------------------------------|--------------------------------------|
| <b>A1</b>                                     | 6786, 15495, 15826                                                                                                                                                                                                           | A4'A5                                       | D2'                                  |
| <b>A</b>                                      | 15720                                                                                                                                                                                                                        |                                             | A'D'D1'H'H1'                         |
| <b>A'B</b>                                    | 158, 356, 4062, 11242, 15650, 16371                                                                                                                                                                                          |                                             |                                      |
| <b>B</b>                                      | 858, 5931, 7629, 9963, 10766, 16055, 16111                                                                                                                                                                                   | A3                                          | D3                                   |
| <b>B1</b>                                     | 5931back, 13818, 15810, 16111back                                                                                                                                                                                            |                                             |                                      |
| <b>A'B'C</b>                                  | 1386del, 2788, 7003, 9241, 10216, 11545, 15602, 15870                                                                                                                                                                        |                                             |                                      |
| <b>C</b>                                      | 956, 2238, 3800, 4884, 4993, 5502, 6078, 7944, 9666, 10219, 11048, 11131, 12354, 13081, 15956, 15974, 16130, 16131, 16113                                                                                                    |                                             |                                      |
| <b>C1</b>                                     | 4599, 9280, 16563insC                                                                                                                                                                                                        |                                             |                                      |
| <b>C2</b>                                     | 267, 15597                                                                                                                                                                                                                   |                                             |                                      |
| <b>A'B'C'D</b>                                | 4646, 5886, 6006, 10378, 13051, 13335, 15650back, 15826back                                                                                                                                                                  | A6 <sup>e</sup>                             |                                      |
| <b>D</b>                                      | 1693, 2216, 5499, 6534, 8869, 9404, 11419, 11459, 12193, 12220, 12793, 13950, 14202, 14827, 15521, 15737, 15770, 15810, 16087, 16111, 16394, 16113                                                                           | E                                           | G'G1'G2'G3'G4'Gx'                    |
| <b>A-I</b>                                    | 4669, 6309, 8007, 11844, 12769, 15585, 15771                                                                                                                                                                                 |                                             |                                      |
| <b>E'F'G'H'I</b>                              | 4830, 13504, 16113, 16130, 16131                                                                                                                                                                                             |                                             |                                      |
| <b>E'F'G</b>                                  | 381, 386, 5832, 8039, 9671, 10473, 12862, 14352, 15542, 15650, 15666                                                                                                                                                         |                                             |                                      |
| <b>E<sup>d</sup></b>                          | 278, 1133, 2938, 4969, 8354, 9333, 10402, 10688, 12655, 12834, 13261, 14208, 14910, 15597, 15956, 15974, 16644                                                                                                               |                                             |                                      |
| <b>F'G</b>                                    | 415, 2940, 3576, 11167, 14628, 14736, 15585back, 15771back                                                                                                                                                                   | A7 <sup>f</sup>                             | X3'X3a'X3b'X3c2'X3d'                 |
| <b>F<sup>d</sup></b>                          | 3371, 3562, 7506, 7748, 8791, 11822, 13044, 15595, 15868, 16113back, 16514                                                                                                                                                   | A2                                          |                                      |
| <b>G</b>                                      | 222, 3053, 5500, 5883, 6690, 9404, 9743A, 11554, 13225, 15635, 15703                                                                                                                                                         | A1                                          | X3c'X3c1'                            |
| <b>G1'G2'G3</b>                               | 15597                                                                                                                                                                                                                        |                                             |                                      |
| <b>G1</b>                                     | 5671, 14653, 15585, 16031                                                                                                                                                                                                    |                                             |                                      |
| <b>G2</b>                                     | 9197                                                                                                                                                                                                                         |                                             |                                      |
| <b>G3</b>                                     | 7689, 11545back                                                                                                                                                                                                              |                                             |                                      |
| <b>H'I</b>                                    | 5217del, 10085, 13763, 15974, 16563insC                                                                                                                                                                                      |                                             |                                      |
| <b>H<sup>d</sup></b>                          | 1545, 1667, 3064, 4182, 5273, 6078, 6129, 6567, 6837, 9211, 10916                                                                                                                                                            |                                             | X4'                                  |
| <b>I</b>                                      | 1586, 1790, 2614, 2770, 4063, 4392, 5061, 5210, 6177, 6249, 8360, 8381, 8794, 9950, 10240, 11829, 12445, 12685, 14556, 15538, 15709, 15826                                                                                   | B1'B2                                       | I'I1'I2'                             |
| <b>I1</b>                                     | 13468, 14040, 15870back                                                                                                                                                                                                      |                                             |                                      |
| <b>A-K</b>                                    | 960, 3070, 3942, 4536, 5529, 7668, 8360, 8567, 10112, 11881, 14805                                                                                                                                                           |                                             |                                      |
| <b>J'K</b>                                    | 1154, 2863, 3963, 4296, 4332, 4608, 6390, 6879, 7059, 7203, 8084, 8444, 9073, 9398, 10219, 12334, 13231, 13338, 13950, 14397, 14553, 15650, 15807, 15871, 16071                                                              |                                             |                                      |
| <b>J</b>                                      | 160, 383T, 2263, 4188, 4785, 6474, 7578, 8291, 9250, 11083, 11823, 11935, 13126, 15532del, 15604, 15827, 16111, 16644                                                                                                        |                                             |                                      |
| <b>K<sup>d</sup></b>                          | 2803, 3283, 3364, 3424, 4893, 5571, 5697, 8077, 8587, 8633, 8662, 9395, 9794, 10417, 11002, 11852, 12709, 14177, 15012, 15173, 15229, 15544, 15585back, 15635, 15683, 15686, 15775, 15956, 16130, 16131, 16331, 16339, 16347 |                                             | X5'X6b'                              |
| <b>A-L</b>                                    | 7902, 10294, 15956                                                                                                                                                                                                           |                                             |                                      |
| <b>L</b>                                      | 1374, 2899, 3070back, 3517, 5817, 7518, 8060, 8303, 8321, 9953, 10423, 10615, 11695, 12121, 12202, 12898, 12952, 13522, 14997, 15315, 15494, 15496, 15534, 15603, 15649,                                                     | D'D1'D2'D3 <sup>g</sup>                     | X1'X2'                               |

|                      |                                                                                                                                                                                                                                                                                                                                                                                                                                             |       |             |
|----------------------|---------------------------------------------------------------------------------------------------------------------------------------------------------------------------------------------------------------------------------------------------------------------------------------------------------------------------------------------------------------------------------------------------------------------------------------------|-------|-------------|
|                      | 15871, 15974, 16068, 16103, 16407del, 16563insC, 16629                                                                                                                                                                                                                                                                                                                                                                                      |       |             |
| <b>L1</b>            | 11684                                                                                                                                                                                                                                                                                                                                                                                                                                       |       |             |
| <b>L2</b>            | 2607, 8405, 15602back                                                                                                                                                                                                                                                                                                                                                                                                                       |       |             |
| <b>L3</b>            | 77                                                                                                                                                                                                                                                                                                                                                                                                                                          |       |             |
| <b>A-Q</b>           | 3800, 8045, 8152, 9088, 10175, 10450, 11968, 13922, 13935, 15585back, 15806, 15870back, 16130, 16131, 16543A                                                                                                                                                                                                                                                                                                                                |       |             |
| <b>M'N'O'P'Q</b>     | 4605, 5829, 6714, 8078, 8240, 8558T, 10861, 11396, 11494, 12334, 13631, 14628, 15344, 16121, 16629                                                                                                                                                                                                                                                                                                                                          |       |             |
| <b>M'N</b>           | 1608T, 2339A, 3475, 3942back, 4526, 4898, 6078, 7434, 8177, 8800, 9334, 9542, 10462, 10648, 12031, 12097, 13102, 13358, 13504, 13617, 13722, 14424, 14673, 14817, 15054A, 15135, 15827, 15869, 16068, 16113, 16546, 16559                                                                                                                                                                                                                   |       |             |
| <b>M</b>             | 426, 3100, 4599G, 5103, 9241back, 15617, 15659, 16080                                                                                                                                                                                                                                                                                                                                                                                       | C1    | B'B1'B2'B3' |
| <b>N</b>             | 2802, 3557, 4917, 8282, 9073, 9404, 10406, 10519, 13569, 15601, 15838, 16007, 16111                                                                                                                                                                                                                                                                                                                                                         | C2    | F           |
| <b>O'P'Q</b>         | 738, 859, 3259T, 3271, 3616, 6531, 7245, 7614T, 7900, 8045back, 8363, 8857, 9777, 11380, 11426, 12169, 12232, 12406, 13465, 15204, 15703, 15777, 15806back, 16038, 16063insC                                                                                                                                                                                                                                                                |       |             |
| <b>O'P</b>           | 1683C, 3557, 7429, 9055, 12289, 13468, 15667, 15809, 16563insC, 16407del                                                                                                                                                                                                                                                                                                                                                                    | F1    | K3'         |
| <b>O<sup>d</sup></b> | 5823, 6747, 7377, 8042, 10363T, 10450back, 10503, 12307, 12929, 13949, 13953, 14827, 15597, 15604, 15635, 16113, 16360                                                                                                                                                                                                                                                                                                                      |       | K3al'       |
| <b>P</b>             | 1382, 6507, 13372                                                                                                                                                                                                                                                                                                                                                                                                                           |       |             |
| <b>Q</b>             | 302, 341, 4201, 7296, 9205, 15740, 15811, 16037, 16057, 16113                                                                                                                                                                                                                                                                                                                                                                               | F2'F3 | K2'         |
| <b>Q1</b>            | 6690                                                                                                                                                                                                                                                                                                                                                                                                                                        |       |             |
| <b>Q2</b>            | 5877, 15995, 16563insC                                                                                                                                                                                                                                                                                                                                                                                                                      |       |             |
| <b>Q3</b>            | 11944, 13234, 15585, 15604                                                                                                                                                                                                                                                                                                                                                                                                                  |       |             |
| <b>A-R</b>           | 287, 724, 2158, 3058, 3848, 4306, 6093, 6300, 7249, 7479, 7726, 8492, 9220, 9403, 10408, 12085, 12316, 12628, 12718, 12802, 13698, 14025, 14898, 15144, 15771back, 15775, 15827                                                                                                                                                                                                                                                             |       |             |
| <b>R</b>             | 2316, 2869, 2887, 3052, 4104, 4113, 4275, 4459, 4596, 4918, 5380, 5418, 5457, 5671, 6177A, 6414, 6600, 6726, 6932, 6949, 7449, 7575, 7578, 7914, 8363, 8504, 8680, 8971, 9304T, 9620, 10369, 10753, 10888, 10927, 11180, 11385, 11616, 12430, 12943, 13213, 13216, 13277T, 13436, 13768, 14116, 14827, 14886, 14955, 15078, 15108, 15249, 15252T, 15598, 15615, 15616, 15659, 15703, 15770, 15776, 15974, 15996, 16103, 16476, 16540, 16629 | G     | X7          |

<sup>a</sup> Mutational motifs are relative to the new proposed *E. caballus* reference sequence (HRS, see Fig. S1 and Table S1 for additional details), which is a member of an A sub-haplogroup.

<sup>b</sup> The old nomenclature (4, 5) was haplotype-oriented and cannot be used for phylogenetic naming of branches.

<sup>c</sup> The "new" nomenclature introduced by Cieslak et al. (6) is even less preferable than the old one.

<sup>d</sup> An accurate diagnostic motif cannot be determined yet due to the availability of only one sequence.

<sup>e</sup> A6 would correspond to a paralogous group.

<sup>f</sup> A7 is probably a sister group to F'G.

<sup>g</sup> D'D1, D2, and D3 might be further sub-classified as L1 (11684), L2 (15602@), and L3 (15604).

**Table S5.** List of mtDNAs from Przewalski's horses.

| GenBank Acc. Numb.          | Control-Region Haplotype (vs HRS)                                                                                                                                                                                  | Hg                  | Sequence Range | Reference  | PubMed Identifier |
|-----------------------------|--------------------------------------------------------------------------------------------------------------------------------------------------------------------------------------------------------------------|---------------------|----------------|------------|-------------------|
| <b>AF014409</b>             | 15386d 15495 15542 15595 15602<br>15650 15666 15720 15868 15870<br>16130 16131 16213-16276d 16371<br>16391A 16407A                                                                                                 | <b>F</b>            | 15369-16660    | (7)        | 10376300          |
| <b>AF055876</b>             | 15542 15595 15602 15650 15666<br>15720 15868 15870                                                                                                                                                                 | <b>F</b>            | 15521-16120    | (8)        | 9883508           |
| <b>AF055877</b>             | 16514                                                                                                                                                                                                              | <b>F</b>            | 16377-16540    | (8)        | 9883508           |
| <b>AF055879</b>             | HRS                                                                                                                                                                                                                | ?                   | 16377-16540    | (8)        | 9883508           |
| <b>AF072994</b>             | 15495 15542 15595 15602 15650<br>15666 15676N 15678N 15720 15868<br>15870 16063N                                                                                                                                   | <b>F</b>            | 15468-16076    | (9)        |                   |
| <b>AF072995</b>             | 15495 15542 15595 15602 15650<br>15666 15720 15868 15870 15974<br>15975 16063N                                                                                                                                     | <b>F</b>            | 15468-16074    | (9)        |                   |
| <b>AF326635</b>             | 15495 15542 15595 15602 15650<br>15666 15720                                                                                                                                                                       | <b>F</b>            | 15479-15828    | (10)       | 11161199          |
| <b>AJ413830</b>             | 15495 15508A 15542 15595 15602<br>15650 15666 15720                                                                                                                                                                | <b>F</b>            | 15427-15740    | (5)        | 12130666          |
| <b>AJ413831</b>             | 15495 15508A 15542 15595 15602<br>15650 15666 15720                                                                                                                                                                | <b>F</b>            | 15427-15740    | (5)        | 12130666          |
| <b>AJ413832</b>             | 15495 15542 15595 15602 15650<br>15666 15720                                                                                                                                                                       | <b>F</b>            | 15427-15740    | (5)        | 12130666          |
| <b>AP012267<sup>a</sup></b> | 15495 15542 15595 15602 15650<br>15666 15720 15868 15870 16130<br>16131N 16211-16226N 16228-<br>16327N 16371 16514 16591-16593N<br>16595N                                                                          | <b>F</b>            | 15469-16660    | (2)        | 21803766          |
| <b>AP012268<sup>a</sup></b> | 15495 15542 15595 15602 15650<br>15666 15720 15868 15870 16130<br>16131N 16245-16248N 16251N<br>16264N 16270-16326N 16328N<br>16371 16421-16424N 16435N<br>16453N 16514 16593-16594N                               | <b>F</b>            | 15469-16660    | (2)        | 21803766          |
| <b>AP012270<sup>a</sup></b> | 15495 15542 15595 15602 15650<br>15666 15720 15868 15870 16130-<br>16131N 16208-16254N 16291-<br>16339N 16371 16392-16422N<br>16424N 16457-16460N 16509N<br>16514 16554-16555N 16557N<br>16574-16601N 16603-16604N | <b>F</b>            | 15469-16660    | (2)        | 21803766          |
| <b>Prz001 &amp; Prz002</b>  | 15495 15542 15595 15602 15650<br>15666 15720 15868 15870 16130<br>16131 16371 16514                                                                                                                                | <b>F</b>            | 15469-16660    | This study |                   |
| <b>AF055878</b>             | 15569 15585 15602 15720 15771<br>15775 15870 15871 16037 16113                                                                                                                                                     | <b>(pre)J<br/>K</b> | 15521-16120    | (8)        | 9883508           |
| <b>AP012269<sup>a</sup></b> | 15495 15569 15585 15602 15720<br>15771 15775 15870 15871 16037<br>16113 16130 16131N 16284N<br>16288-16327N 16371 16557N                                                                                           | <b>(pre)J<br/>K</b> | 15469-16660    | (2)        | 21803766          |
| <b>DQ900930<sup>b</sup></b> | 15495 15595 15597 15602 15604<br>15703 15720 15740                                                                                                                                                                 | <b>F</b>            | 15493-15756    | (11)       |                   |

<sup>a</sup> For these samples, complete mtDNA sequences are available.

<sup>b</sup> This is the only ancient specimen bearing an mtDNA haplotype likely belonging to haplogroup F, similarly to modern Przewalski's horses.

**Table S6.** References and PubMed identifiers for the analyzed control-region sequences from modern and ancient horse samples.

| Reference                                                 | PubMed Identifier | Number of Subjects |
|-----------------------------------------------------------|-------------------|--------------------|
| <b>MODERN DNA DATA</b>                                    |                   |                    |
| (12)                                                      | 20926431          | 104                |
| (13)                                                      | 19789983          | 29                 |
| (14)                                                      | 19744143          | 116                |
| (15)                                                      | 18680492          | 43                 |
| (16)                                                      | 17897600          | 12                 |
| (17)                                                      | 17707216          | 5                  |
| (18)                                                      | 17265183          | 289                |
| (19)                                                      | 17132900          | 3                  |
| (20)                                                      | 16978181          | 213                |
| (21)                                                      | 16489143          | 88                 |
| (22)                                                      | 16251517          | 96                 |
| (23)                                                      | 15932397          | 172                |
| (24)                                                      | 15496286          | 34                 |
| (25)                                                      | 12427390          | 25                 |
| (26)                                                      | 12354144          | 31                 |
| (27)                                                      | 12139508          | 101                |
| (28)                                                      | 12137332          | 65                 |
| (5)                                                       | 12130666          | 307                |
| (10)                                                      | 11161199          | 32                 |
| (29)                                                      | 10690354          | 24                 |
| (30)                                                      | 10612231          | 9                  |
| (7)                                                       | 10376300          | 13                 |
| (8)                                                       | 9883508           | 2                  |
| (31)                                                      | 7985837           | 3                  |
| (9)                                                       | -                 | 261                |
| This study                                                | -                 | 186                |
| <b>Total</b>                                              |                   | <b>2263</b>        |
| <b>ANCIENT DNA DATA (from Pleistocene to Middle Ages)</b> |                   |                    |
| (6)                                                       | 21187961          | 52                 |
| (32)                                                      | 19943892          | 4                  |
| (13)                                                      | 19789983          | 26                 |
| (4)                                                       | -                 | 22                 |
| (11)                                                      | -                 | 8                  |
| (20)                                                      | 16978181          | 4                  |
| (33)                                                      | 15932398          | 7                  |
| (34)                                                      | 15040002          | 3                  |
| (10)                                                      | 11161199          | 4                  |
| (9)                                                       | -                 | 8                  |
| <b>Total</b>                                              |                   | <b>138</b>         |



**Table S7.** Haplogroup affiliation of modern horse control-region sequences from different geographic areas <sup>a</sup>.

| Haplogroup <sup>b</sup>        | Geographic Area <sup>c</sup> |                             |                            |                 |                    |                           |                           | Total <sup>b</sup> |
|--------------------------------|------------------------------|-----------------------------|----------------------------|-----------------|--------------------|---------------------------|---------------------------|--------------------|
|                                | Africa<br>N = 27             | America<br>North<br>N = 104 | America<br>South<br>N = 71 | Asia<br>N = 587 | Europe<br>N = 1249 | Middle<br>East<br>N = 192 | Unspecifi<br>ed<br>N = 33 |                    |
| <b>A</b>                       | ...                          | 3 (2.88)                    | 3 (4.23)                   | 70 (11.93)      | 56 (4.49)          | 15 (7.81)                 | 3 (9.09)                  | 150 (6.63)         |
| <b>B</b>                       | 2 (7.41)                     | 24 (23.08)                  | 9 (12.68)                  | 10 (1.70)       | 117 (9.38)         | 21 (10.94)                | 3 (9.09)                  | 186 (8.22)         |
| <b>C</b>                       | ...                          | ...                         | ...                        | 21 (3.58)       | 5 (0.32)           | 6 (3.13)                  | ...                       | 32 (1.37)          |
| <b>D</b>                       | 1 (3.70)                     | ...                         | ...                        | 17 (2.90)       | 57 (4.57)          | 4 (2.08)                  | 2 (6.06)                  | 81 (3.58)          |
| <b>E</b>                       | 0                            | 1 (0.96)                    | ...                        | 13 (2.21)       | 6 (0.48)           | 1 (0.52)                  | ...                       | 21 (0.93)          |
| <b>E-G general<br/>(non-F)</b> | ...                          | ...                         | ...                        | 4 (0.68)        | 13 (1.04)          | 2 (1.04)                  | ...                       | 19 (0.84)          |
| <b>F</b>                       | ...                          | ...                         | ...                        | 18 (3.07)       | ...                | ...                       | ...                       | 18 (0.80)          |
| <b>G</b>                       | ...                          | 7 (6.73)                    | 2 (2.82)                   | 96 (16.35)      | 109 (8.73)         | 16 (8.33)                 | 3 (9.09)                  | 233 (10.30)        |
| <b>H</b>                       | ...                          | ...                         | ...                        | 8 (1.36)        | 13 (1.04)          | ...                       | 1 (3.03)                  | 22 (0.97)          |
| <b>I</b>                       | 1 (3.70)                     | ...                         | 4 (5.63)                   | 36 (6.13)       | 100 (8.01)         | 22 (11.46)                | 5 (15.15)                 | 168 (7.43)         |
| <b>J-K</b>                     | ...                          | 1 (0.96)                    | 1 (1.41)                   | 38 (6.47)       | 7 (0.56)           | 7 (3.65)                  | ...                       | 54 (2.39)          |
| <b>L</b>                       | 21 (77.78)                   | 61 (58.65)                  | 34 (47.89)                 | 79 (13.46)      | 475<br>(38.06)     | 43 (22.40)                | 8 (24.24)                 | 721 (31.87)        |
| <b>M</b>                       | ...                          | 3 (2.88)                    | 4 (5.63)                   | 24 (4.09)       | 91 (7.29)          | 10 (5.21)                 | 1 (3.03)                  | 133 (5.88)         |
| <b>M'N</b>                     | ...                          | ...                         | ...                        | 5 (0.85)        | 1 (0.08)           | ...                       | ...                       | 6 (0.27)           |
| <b>N</b>                       | 1 (3.70)                     | 3 (2.88)                    | 9 (12.68)                  | 17 (2.90)       | 106 (8.49)         | 6 (3.13)                  | 1 (3.03)                  | 143 (6.32)         |
| <b>O'P</b>                     | 1 (3.70)                     | ...                         | 3 (4.23)                   | 39 (6.64)       | 17 (1.36)          | 16 (8.33)                 | 3 (9.09)                  | 79 (3.49)          |
| <b>Q</b>                       | ...                          | 1 (0.96)                    | 2 (2.82)                   | 81 (13.80)      | 48 (3.85)          | 20 (10.42)                | 3 (9.09)                  | 155 (6.85)         |
| <b>R</b>                       | ...                          | ...                         | ...                        | 11 (1.87)       | 28 (2.24)          | 3 (1.56)                  | ...                       | 42 (1.86)          |

<sup>a</sup> MtDNA control-region sequences are from GenBank. Reference sources are listed in Table S6.

<sup>b</sup> Haplogroup classification is based on control-region motifs, as reported in Table S4.

<sup>c</sup> Haplogroup frequencies (%) are in parentheses. Sequences with an ambiguous haplogroup affiliation were not included.

**Table S8.** Haplogroup affiliation of ancient horse control-region sequences from different continents <sup>a</sup>.

| Haplogroup | Geographic Area |                |                |
|------------|-----------------|----------------|----------------|
|            | Asia<br>N=68    | Europe<br>N=70 | Total<br>N=138 |
| <b>A</b>   | 6 (8.82)        | 8 (11.43)      | 14 (10.14)     |
| <b>D</b>   | 7 (10.29)       | 1 (1.43)       | 8 (5.80)       |
| <b>E'G</b> | 15 (22.06)      | 7 (10.00)      | 22 (15.94)     |
| <b>F</b>   | 1 (1.47)        | ...            | 1 (0.72)       |
| <b>H</b>   | 4 (5.88)        | 2 (2.86)       | 6 (4.35)       |
| <b>I</b>   | 2 (2.94)        | 6 (8.57)       | 8 (5.80)       |
| <b>K</b>   | 2 (2.94)        | 2 (2.86)       | 4 (2.90)       |
| <b>L</b>   | 7 (10.29)       | 15 (21.43)     | 22 (15.94)     |
| <b>M</b>   | 2 (2.94)        | 12 (17.14)     | 14 (10.14)     |
| <b>N</b>   | 3 (4.41)        | 7 (10.00)      | 10 (7.25)      |
| <b>O'P</b> | 7 (10.29)       | 2 (2.86)       | 9 (6.52)       |
| <b>Q</b>   | 7 (10.29)       | 3 (4.29)       | 10 (7.25)      |
| <b>R</b>   | 5 (7.35)        | 5 (7.14)       | 10 (7.25)      |

<sup>a</sup> MtDNA control-region sequences are from GenBank. Reference sources are listed in Table S6.

<sup>b</sup> Haplogroup classification is based on control-region motifs, as reported in Table S4.

<sup>c</sup> Haplogroup frequencies (%) are in parentheses. Sequences with an ambiguous haplogroup affiliation were not included.

**Table S9.** Geographic origin, dating and haplogroup affiliation of horse control-region sequences from ancient horse samples predating domestication times <sup>a</sup>.

| <b>GenBank #</b> | <b>Continent /Geographic Area</b> | <b>Age of the Specimen</b>                | <b>Hg</b>  | <b>Reference</b> | <b>PubMed Identifier</b> |
|------------------|-----------------------------------|-------------------------------------------|------------|------------------|--------------------------|
| <b>FJ204318</b>  | Asia (Siberia)                    | Late Pleistocene                          | <b>E-G</b> | (6)              | 21187961                 |
| <b>FJ204324</b>  | Asia (North Siberia)              | Late Pleistocene                          | <b>E-G</b> | (6)              | 21187961                 |
| <b>FJ204351</b>  | Europe (Germany)                  | Late Glaciation-Mesolithic (15-14000 BCE) | <b>M</b>   | (6)              | 21187961                 |
| <b>FJ204352</b>  | Europe (Germany)                  | Late Glaciation-Mesolithic (14-11000 BCE) | <b>M</b>   | (6)              | 21187961                 |
| <b>FJ204382</b>  | Europe (Spain)                    | Mesolithic/Neolithic (5200-4900 BCE)      | <b>M</b>   | (6)              | 21187961                 |
| <b>DQ683528</b>  | Europe (Iberia)                   | Neolithic/Bronze Age                      | <b>M</b>   | (32)             | 19943892                 |
| <b>DQ683526</b>  | Europe (Iberia)                   | Neolithic/Bronze Age                      | <b>A</b>   | (32)             | 19943892                 |
| <b>DQ683532</b>  | Europe (Iberia)                   | Neolithic/Bronze Age                      | <b>H</b>   | (32)             | 19943892                 |
| <b>DQ683531</b>  | Europe (Iberia)                   | Neolithic/Bronze Age                      | <b>L</b>   | (32)             | 19943892                 |

<sup>a</sup> These are a subset of the ancient samples listed in Table S6.

**Table S10.** Oligonucleotide pairs used to amplify the horse mitochondrial genome in 11 overlapping PCR fragments<sup>a</sup>.

| PCR ID Number | Fragment Length (bps) | Name <sup>b</sup> | Sequence (5' → 3')      | T <sub>m</sub> (°C) |
|---------------|-----------------------|-------------------|-------------------------|---------------------|
| <b>1</b>      | 1989                  | 175For            | AGGAGCAGGTATCAAGCACAC   | 59.25               |
|               |                       | 2163Rev           | TTAGTCATTCCCGCCTCTTC    | 59.27               |
| <b>2</b>      | 1944                  | 1679For           | TCCAACAATCAACCCAAAC     | 59.35               |
|               |                       | 3622Rev           | TTGGTCATATCGGAATCGTG    | 59.37               |
| <b>3</b>      | 2028                  | 3124For           | ATCAGGATGGGCCTCAAAC     | 59.46               |
|               |                       | 5151Rev           | AATTCGTGGGATGGTAGCC     | 59.57               |
| <b>4</b>      | 2085                  | 4842For           | GACCATATTCCCATCCACAAAC  | 59.61               |
|               |                       | 6926Rev           | GGGTTTCGATTCTTCCTTTC    | 59.75               |
| <b>5</b>      | 1894                  | 6544For           | CACTGATTCCCTCTATTCTCAGG | 59.79               |
|               |                       | 8437Rev           | ACGGCTAGGGCTACAGGTTG    | 59.87               |
| <b>6</b>      | 1992                  | 7978For           | TATTCGCCTCTTTCGCTACC    | 59.88               |
|               |                       | 9969Rev           | GGCCTACGAGGGATACTGTG    | 59.88               |
| <b>7</b>      | 1878                  | 9538For           | CCTCGCTACTCGTACTCATCG   | 59.98               |
|               |                       | 11415Rev          | GCGGTGATGGTGATATTGG     | 60.05               |
| <b>8</b>      | 1799                  | 11096For          | ATCGTAGCCGTCCTCATCC     | 60.05               |
|               |                       | 12894Rev          | GTGGTGGTGAAGGGTATTGC    | 60.24               |
| <b>9</b>      | 1852                  | 12546For          | CAGGCGTCTTCCTGCTAATC    | 60.28               |
|               |                       | 14397Rev          | GCAGATGTGAGTGACGGATG    | 60.31               |
| <b>10</b>     | 1867                  | 14001For          | CCCTCCACTTACAATCAGCAC   | 60.44               |
|               |                       | 15867Rev          | ATGGCCCTGAAGAAAGAACC    | 60.59               |
| <b>11</b>     | 1860                  | 15364For          | AAACCAGAAAAGGGGGAAAA    | 61.07               |
|               |                       | 00563Rev          | TGGCGAATAGCTTTGTTGTG    | 61.56               |

<sup>a</sup>The annealing temperature for all PCR reactions is 55°C.

<sup>b</sup>Primer names correspond to the (5') nucleotide position in HRS.

**Table S11.** Oligonucleotides used for sequencing the horse mitochondrial genome.

| PCR ID Number | Name <sup>a</sup> | Sequence (5' → 3')      | T <sub>m</sub> (°C) |
|---------------|-------------------|-------------------------|---------------------|
| 1             | 204For            | AGCTCATAACACCTTGCTCA    | 56.09               |
| 1             | 715For            | CAAGGTACCGAAGTAAGCAC    | 55.08               |
| 1             | 1234For           | TAAGGGAACGATGAAAGATG    | 55.31               |
| 2             | 1729For           | TCAACACATAGAAGCAATAATGT | 54.26               |
| 2             | 2224For           | CCTTAACCTTCAGGGACAAC    | 56.23               |
| 2             | 2834For           | TTGAACGAAAAGTCTTAGGC    | 54.85               |
| 3             | 3231For           | TCCTAATAAGCGGATCATT     | 54.50               |
| 3             | 3800For           | TACAGGAATTGAACCTGCTC    | 55.37               |
| 3             | 4341For           | ACTAGCCCCAATATCAATCC    | 55.61               |
| 4             | 4913For           | CCCCGTTAATTGTTATATCC    | 53.74               |
| 4             | 5437For           | GCTGGAATAGTAGGAACTGC    | 54.21               |
| 4             | 6042For           | TCCAATCCTTTATCAACACC    | 54.97               |
| 5             | 6636For           | CTTCCCACAACATTTTCCTT    | 55.02               |
| 5             | 7119For           | CGACCACACACTAATAATCG    | 54.14               |
| 5             | 7661For           | GCTTTATACCAATTGTCCTTG   | 54.16               |
| 6             | 8081For           | CAATCGCCTAATCTCAATTC    | 54.98               |
| 6             | 8591For           | CCAAGCCTACGTATTCCTC     | 54.99               |
| 6             | 9128For           | GGCCTATTCATCACAATTC     | 54.63               |
| 7             | 9604 For          | CATATGAATGCGGATTTGAC    | 56.47               |
| 7             | 10171For          | GAGTAGACCACGTACAAAACC   | 53.90               |
| 7             | 10691For          | GCACTAATCTCTATCCAAAACC  | 54.79               |
| 8             | 11161For          | CGGCCTTACATCATCAATAC    | 55.63               |
| 8             | 11650For          | CCGAGAAAGTATGCAAGAAC    | 55.12               |
| 8             | 12098For          | TGATACATGCACTCAGATCC    | 54.35               |
| 9             | 12600For          | TCCAGTCACTTACCCTATGC    | 55.24               |
| 9             | 13141For          | CATCAAACGCCTCTTAATTG    | 56.00               |
| 9             | 13686For          | AGCCCCTATAATTTTCCTCAC   | 54.94               |
| 10            | 14056For          | AACCCACAAAACATAACAAC    | 54.15               |
| 10            | 14496For          | CTACGGCTCTTACACATTCC    | 54.99               |
| 10            | 15003For          | GTACTTCCTGTTTGCCTACG    | 55.08               |
| 11            | 15433For          | CACCCAAAGCTGAAATTCTA    | 55.55               |
| 11            | 16656Rev          | GAAGAAGGGTTGACAGATTTAG  | 54.83               |
| 11            | 418Rev            | TACGGCTTAACTGGGTTTTA    | 55.20               |

<sup>a</sup>Primer names correspond to the (5') nucleotide position in HRS.

## Supporting References

1. Nergadze SG, et al. (2010) Mitochondrial DNA insertions in the nuclear horse genome. *Anim Genet* 41 Suppl 2:176-185.
2. Goto H, et al. (2011) A massively parallel sequencing approach uncovers ancient origins and high genetic variability of endangered Przewalski's horses. *Genome biology and evolution*.
3. Ronquist F, Huelsenbeck JP (2003) MrBayes 3: Bayesian phylogenetic inference under mixed models. *Bioinformatics* 19:1572-1574.
4. Cai D, et al. (2009) Ancient DNA provides new insights into the origin of the Chinese domestic horse. *J Archaeol Sci* 36:835-842.
5. Jansen T, et al. (2002) Mitochondrial DNA and the origins of the domestic horse. *Proc Natl Acad Sci U S A* 99:10905-10910.
6. Cieslak M, et al. (2010) Origin and history of mitochondrial DNA lineages in domestic horses. *PLoS One* 5:e15311.
7. Kim KI, et al. (1999) Phylogenetic relationships of Cheju horses to other horse breeds as determined by mtDNA D-loop sequence polymorphism. *Anim Genet* 30:102-108.
8. Oakenfull EA, Ryder OA (1998) Mitochondrial control region and 12S rRNA variation in Przewalski's horse (*Equus przewalskii*). *Anim Genet* 29:456-459.
9. GenBank (2011) in <http://www.ncbi.nlm.nih.gov>.
10. Vilà C, et al. (2001) Widespread origins of domestic horse lineages. *Science* 291:474-477.
11. Cai D, et al. (2007) Mitochondrial DNA analysis of Bronze Age horses recovered from Chifeng region, Inner Mongolia, China. *Prog Nat Sci* 17:544-550.
12. Bower MA, et al. (2010) The cosmopolitan maternal heritage of the Thoroughbred racehorse breed shows a significant contribution from British and Irish native mares. *Biol Lett* 7:316-320.
13. Priskin K, et al. (2010) Mitochondrial sequence variation in ancient horses from the Carpathian Basin and possible modern relatives. *Genetica* 138:211-218.

14. Lei CZ, et al. (2009) Multiple maternal origins of native modern and ancient horse populations in China. *Anim Genet* 40:933-944.
15. Pérez-Gutiérrez LM, De la Pena A, Arana P (2008) Genetic analysis of the Hispano-Breton heavy horse. *Anim Genet* 39:506-514.
16. Glazewska I, Wysocka A, Gralak B, Sell J (2007) A new view on dam lines in Polish Arabian horses based on mtDNA analysis. *Genet Sel Evol* 39:609-619.
17. Xu S, et al. (2007) High altitude adaptation and phylogenetic analysis of Tibetan horse based on the mitochondrial genome. *J Genet Genomics* 34:720-729.
18. Kakoi H, Tozaki T, Gawahara H (2007) Molecular analysis using mitochondrial DNA and microsatellites to infer the formation process of Japanese native horse populations. *Biochem Genet* 45:375-395.
19. Iwanczyk E, Juras R, Cholewinski G, Cothran EG (2006) Genetic structure and phylogenetic relationships of the Polish Heavy horse. *J Appl Genet* 47:353-359.
20. McGahern AM, et al. (2006) Mitochondrial DNA sequence diversity in extant Irish horse populations and in ancient horses. *Anim Genet* 37:498-502.
21. Luis C, Bastos-Silveira C, Cothran EG, Oom Mdo M (2006) Iberian origins of New World horse breeds. *J Hered* 97:107-113.
22. Royo LJ, et al. (2005) The origins of Iberian horses assessed via mitochondrial DNA. *J Hered* 96:663-669.
23. Lopes MS, et al. (2005) The Lusitano horse maternal lineage based on mitochondrial D-loop sequence variation. *Anim Genet* 36:196-202.
24. Cozzi MC, et al. (2004) Mitochondrial D-loop sequence variation among Italian horse breeds. *Genet Sel Evol* 36:663-672.
25. Kavar T, Brem G, Habe F, Solkner J, Dovc P (2002) History of Lipizzan horse maternal lines as revealed by mtDNA analysis. *Genet Sel Evol* 34:635-648.

26. Mirol PM, Peral Garcia P, Vega-Pla JL, Dulout FN (2002) Phylogenetic relationships of Argentinean Creole horses and other South American and Spanish breeds inferred from mitochondrial DNA sequences. *Anim Genet* 33:356-363.
27. Hill EW, et al. (2002) History and integrity of thoroughbred dam lines revealed in equine mtDNA variation. *Anim Genet* 33:287-294.
28. Yang YH, Kim KI, Cothran EG, Flannery AR (2002) Genetic diversity of Cheju horses (*Equus caballus*) determined by using mitochondrial DNA D-loop polymorphism. *Biochem Genet* 40:175-186.
29. Bowling AT, Del Valle A, Bowling M (2000) A pedigree-based study of mitochondrial D-loop DNA sequence variation among Arabian horses. *Anim Genet* 31:1-7.
30. Kavar T, Habe F, Brem G, Dovc P (1999) Mitochondrial D-loop sequence variation among the 16 maternal lines of the Lipizzan horse breed. *Anim Genet* 30:423-430.
31. Ishida N, et al. (1994) Polymorphic sequence in the D-loop region of equine mitochondrial DNA. *Anim Genet* 25:215-221.
32. Lira J, et al. (2010) Ancient DNA reveals traces of Iberian Neolithic and Bronze Age lineages in modern Iberian horses. *Mol Ecol* 19:64-78.
33. Keyser-Tracqui C, et al. (2005) Mitochondrial DNA analysis of horses recovered from a frozen tomb (Berel site, Kazakhstan, 3rd Century BC). *Anim Genet* 36:203-209.
34. Di Bernardo G, et al. (2004) Genetic characterization of Pompeii and Herculaneum Equidae buried by Vesuvius in 79 AD. *J Cell Physiol* 199:200-205.
